# Supplementary material for: Benefits and harms of cervical screening, triage and treatment strategies in women living with HIV
Source: PubMed Central journal article supplement (PMC10719091; doi:10.1038/s41591-023-02601-3), 2023-12-12
Supplement: 41591_2023_2601_MOESM1_ESM.pdf [file 41591_2023_2601_MOESM1_ESM.pdf]

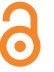

---

# Benefits and harms of cervical screening, triage and treatment strategies in women living with HIV

---

In the format provided by the authors and unedited

---

*Supplementary Table 1 HPV-type specific multipliers for eventual risk of acquisition, progression and regression of HPV associated disease for HIV positive individuals<sup>38\*</sup>. Table reproduced with minor alterations from Hall et al. 2020 PLOS ONE.<sup>1</sup>*

| <b>Parameter description</b>                                       | <b>Assumed parameter value<sup>+</sup></b>         |
|--------------------------------------------------------------------|----------------------------------------------------|
| Multiplier increasing HPV acquisition for HIV positive individuals | 2.75                                               |
| Clearance of an HPV infection (no CIN)                             | 0.6                                                |
| Progression from HPV infection to CIN1                             | 3.73                                               |
| Progression from HPV infection to CIN2                             | 1.3                                                |
| Regression from CIN1 to clearance or HPV infected                  | 0.7 for HIV 16/18<br>0.67 for all other HPV types. |
| Regression from CIN2/3 to clearance, HPV infection or CIN1         | 0.57                                               |
| Progression from CIN3 to invasive cervical cancer                  | 2.5                                                |

<sup>+</sup>Note that these parameters are the same for all HPV types except where otherwise stated.

*Supplementary Table 2 Summary of disease control interventions for HIV.*

| <b>Intervention</b>                        | <b>Disease</b>                                       | <b>Description</b>                                                                                                                                                                                                                                                                                                                                                                                           |
|--------------------------------------------|------------------------------------------------------|--------------------------------------------------------------------------------------------------------------------------------------------------------------------------------------------------------------------------------------------------------------------------------------------------------------------------------------------------------------------------------------------------------------|
| Anti-retroviral therapy (ART)              | HIV (secondary benefit to HPV in HIV-positive women) | In virally suppressed patients, ART halts disease progression and reduces HIV-related mortality in patients without AIDS. HIV-positive women with HPV infection and/or cervical precancer experience a more aggressive HPV natural history, which can be mitigated through viral suppression. Partially treated individuals experience reduced HIV-mortality rates, with no benefit to cervical cancer risk. |
| Voluntary medical male circumcision (VMMC) | HIV and HPV                                          | VMMC reduces the per-timestep risk of HIV and HPV acquisition in males.                                                                                                                                                                                                                                                                                                                                      |
| Condom use                                 | HIV and HPV                                          | Condom use reduces the per-timestep risk of HIV and HPV acquisition in males and females.                                                                                                                                                                                                                                                                                                                    |
| Pre-exposure prophylaxis (PrEP)            | HIV                                                  | PrEP is assumed to remove males and females from the population susceptible to HIV. Assumed coverage of PrEP in this analysis is 0%.                                                                                                                                                                                                                                                                         |

Supplementary Table 3 HPV-FRAME analysis domain descriptions.

| Domain | Description                                                                |
|--------|----------------------------------------------------------------------------|
| CRS    | Core reporting standards                                                   |
| 1      | Vaccination in adolescents                                                 |
| 2      | Vaccination in adults                                                      |
| 3      | Vaccination in MSM                                                         |
| 4      | Models of HPV-associated cancers among individuals living with HIV (ILWH). |
| 5      | HPV prevention in LMIC                                                     |
| 6      | Cervical screening (including integrated vaccination and screening)        |
| 7      | Alternative vaccine types or reduced-dose schedules                        |

\* screening should be included for countries where significant screening exists

Supplementary Table 4 Reportable model input and output descriptions for this analysis.

| Domain | Inputs                                       | Reported by age? (Y/N) | Report by sex (F/M/Both)? | Comments                                                                     |
|--------|----------------------------------------------|------------------------|---------------------------|------------------------------------------------------------------------------|
| CRS    | Target population for intervention           | Y                      | F                         | Reported in methods subsection titled 'Scenarios for evaluation'.            |
| CRS    | Sexual behaviour                             | Y                      | Both                      | Reported in previous publication (Hall et. al.PLoS ONE 2020). <sup>1</sup>   |
| CRS    | Cohort examined for evaluation/ time horizon | Y                      | F                         | Reported in methods subsection titled 'Scenarios for evaluation'.            |
| CRS    | Quality of life assumptions                  | N/A                    | N/A                       | Not applicable.                                                              |
| CRS    | Calibration                                  | Y                      | Both                      | Reported in a previous publication (Hall et. al.PLoS ONE 2020). <sup>1</sup> |
| CRS    | Validation (where possible)                  | Y                      | Both                      | Reported in a previous publication (Hall et. al.PLoS ONE 2020). <sup>1</sup> |
| CRS    | Costs                                        | N/A                    | N/A                       | Not applicable.                                                              |
| 2      | Vaccine coverage at older ages               | N/A                    | N/A                       | Not applicable.                                                              |
| 1      | Vaccine uptake                               | N/A                    | N/A                       | Not applicable.                                                              |
| 1      | Vaccine efficacy                             | N/A                    | N/A                       | Not applicable.                                                              |
| 1      | Vaccine cross-protection                     | N/A                    | N/A                       | Not applicable.                                                              |
| 1      | Duration vaccine protection and waning       | N/A                    | N/A                       | Not applicable.                                                              |
| 1      | Vaccine and delivery costs                   | N/A                    | N/A                       | Not applicable.                                                              |

|   |                                                                                                                                                         |     |      |                                                                                                                                                                                                                                                                               |
|---|---------------------------------------------------------------------------------------------------------------------------------------------------------|-----|------|-------------------------------------------------------------------------------------------------------------------------------------------------------------------------------------------------------------------------------------------------------------------------------|
| 1 | Pre-vaccination disease burden (including population attributable fractions for HPV)                                                                    | Y   | F    | Reported in a previous publication (Hall et. al.PLoS ONE 2020). <sup>1</sup>                                                                                                                                                                                                  |
| 1 | Heterogeneity in sexual behaviour                                                                                                                       | Y   | Both | Reported in a previous publication (Hall et. al.PLoS ONE 2020). <sup>1</sup>                                                                                                                                                                                                  |
| 1 | Duration of natural immunity                                                                                                                            | N/A | Both | Reported in a previous publication (Hall et. al.PLoS ONE 2020). <sup>1</sup>                                                                                                                                                                                                  |
| 2 | Natural history parameters, specifically for older individuals: structure; rate of infection clearance; loss of natural immunity; simulation of latency | N/A | N/A  | Not applicable.                                                                                                                                                                                                                                                               |
| 3 | MSM-specific disease burden                                                                                                                             | N/A | N/A  | Not applicable.                                                                                                                                                                                                                                                               |
| 3 | Interaction between HIV and HPV                                                                                                                         | N/A | N/A  | Not applicable.                                                                                                                                                                                                                                                               |
| 3 | Prior exposure                                                                                                                                          | N/A | N/A  | Not applicable.                                                                                                                                                                                                                                                               |
| 4 | HPV prevalence, CIN prevalence and cervical cancer incidence by HIV status                                                                              | Y   | F    | Reported in a previous publication (Hall et. al.PLoS ONE 2020). <sup>1</sup>                                                                                                                                                                                                  |
| 4 | HPV disease multipliers on HPV acquisition, progression from HPV infection to cancer (or relevant precursors, if modelled) for HIV-infected women/men   | N/A | F    | Reported in a previous publication (Hall et. al.PLoS ONE 2020). <sup>1</sup>                                                                                                                                                                                                  |
| 4 | HPV-associated cancer mortality by HIV status (and CD4 count if modelled)                                                                               | Y   | F    | Reported in a previous publication (Hall et. al.PLoS ONE 2020). <sup>1</sup>                                                                                                                                                                                                  |
| 4 | Relevant co-morbidities                                                                                                                                 | N/A | N/A  | Not applicable.                                                                                                                                                                                                                                                               |
| 4 | HPV-associated screening sensitivity/specificity by HIV status                                                                                          | N/A | F    | Reported in the appendix to the companion article 'Benefits, harms and cost-effectiveness of cervical screening and treatment in 78 low-income and lower-middle income countries for women in the general population: modelling to support updated WHO cervical screening and |

|   |                                                                                    |     |      |                                                                                                                                                                                                                                                                                                                                                  |
|---|------------------------------------------------------------------------------------|-----|------|--------------------------------------------------------------------------------------------------------------------------------------------------------------------------------------------------------------------------------------------------------------------------------------------------------------------------------------------------|
|   |                                                                                    |     |      | treatment guidelines to prevent cervical cancer' by Simms & Keane.                                                                                                                                                                                                                                                                               |
| 5 | HIV prevalence rates, if endemic in country                                        | Y   | Both | Reported in a previous publication (Hall et. al.PLoS ONE 2020). <sup>1</sup>                                                                                                                                                                                                                                                                     |
| 5 | Description of any opportunistic or pilot/demonstration screening projects ongoing | Y   | F    | Reported in the discussion.                                                                                                                                                                                                                                                                                                                      |
| 6 | Routine screening behaviour (routine and follow-up and test-of-cure)               | Y   | F    | Reported in methods subsection titled 'Scenarios for evaluation' and 'Screening attendance and treatment delivery'.                                                                                                                                                                                                                              |
| 6 | Screening test(s) and colposcopy accuracies                                        | N/A | F    | Reported in the appendix to the companion article 'Benefits, harms and cost-effectiveness of cervical screening and treatment in 78 low-income and lower-middle income countries for women in the general population: modelling to support updated WHO cervical screening and treatment guidelines to prevent cervical cancer' by Simms & Keane. |
| 6 | Abnormal test management (primary and triage)                                      | N/A | F    | Reported in the appendix to the companion article 'Benefits, harms and cost-effectiveness of cervical screening and treatment in 78 low-income and lower-middle income countries for women in the general population: modelling to support updated WHO cervical screening and treatment guidelines to prevent cervical cancer' by Simms & Keane. |
| 6 | Diagnostic follow-up of abnormal tests                                             | N/A | F    | Reported in the appendix to the companion article 'Benefits, harms and cost-effectiveness of cervical screening and treatment in 78 low-income and lower-                                                                                                                                                                                        |

|   |                                                                     |                               |                                  |                                                                                                                                                                                                                                                                                                                                                  |
|---|---------------------------------------------------------------------|-------------------------------|----------------------------------|--------------------------------------------------------------------------------------------------------------------------------------------------------------------------------------------------------------------------------------------------------------------------------------------------------------------------------------------------|
|   |                                                                     |                               |                                  | middle income countries for women in the general population: modelling to support updated WHO cervical screening and treatment guidelines to prevent cervical cancer' by Simms & Keane.                                                                                                                                                          |
| 6 | Management by disease grade (confirmed disease)                     | N/A                           | F                                | Reported in the appendix to the companion article 'Benefits, harms and cost-effectiveness of cervical screening and treatment in 78 low-income and lower-middle income countries for women in the general population: modelling to support updated WHO cervical screening and treatment guidelines to prevent cervical cancer' by Simms & Keane. |
| 6 | Sources of information for screening structure and parameterisation | N/A                           | F                                | Reported in the appendix to the companion article 'Benefits, harms and cost-effectiveness of cervical screening and treatment in 78 low-income and lower-middle income countries for women in the general population: modelling to support updated WHO cervical screening and treatment guidelines to prevent cervical cancer' by Simms & Keane. |
| 6 | Herd effect                                                         | N/A                           | F                                | Model is transmission dynamic, so inclusion of herd effects is intrinsic to the model structure.                                                                                                                                                                                                                                                 |
| 6 | Association between vaccination and screening uptake                | N/A                           | N/A                              | Not applicable.                                                                                                                                                                                                                                                                                                                                  |
| 6 | Fixed – variable costs                                              | N/A                           | N/A                              | Not applicable.                                                                                                                                                                                                                                                                                                                                  |
| 7 | Timing between doses (for 2-dose)                                   | N/A                           | N/A                              | Not applicable.                                                                                                                                                                                                                                                                                                                                  |
|   | <b>Outputs</b>                                                      | <b>Reported by age? (Y/N)</b> | <b>Report by sex (F/M/Both)?</b> | <b>Comments</b>                                                                                                                                                                                                                                                                                                                                  |

|     |                                                                                                           |                         |     |                                                                 |
|-----|-----------------------------------------------------------------------------------------------------------|-------------------------|-----|-----------------------------------------------------------------|
| CRS | Cancer incidence, mortality, life years, QALYs/DALYs (as appropriate)                                     | Reported but not by age | F   | Reported in the results sub-sections 'Benefits' and 'Harm'.     |
| CRS | HPV prevalence, pre-intervention                                                                          | N/A                     | N/A | Outcome not reported.                                           |
| CRS | CIN2/3 detected                                                                                           | Reported but not by age | F   | Reported in the results sub-section titled 'Harm'.              |
| CRS | Sensitivity analysis on key inputs                                                                        | Reported but not by age | F   | Reported in results subsection 'Sensitivity analysis findings'. |
| CRS | Incremental cost-effectiveness ratios and costs saved                                                     | N/A                     | N/A | Outcome not reported.                                           |
| 1   | Absolute reductions in HPV infections, and/or warts, post-vaccination                                     | N/A                     | N/A | Outcome not reported.                                           |
| 1   | Absolute reductions in CIN2+ post-vaccination                                                             | N/A                     | N/A | Outcome not reported.                                           |
| 1   | Absolute reductions in invasive cancer (cervical and other HPV cancers, as relevant) post-vaccination     | N/A                     | N/A | Outcome not reported.                                           |
| 4   | Reduction in cervical cancer incidence over time by HIV status (and CD4 count and ART status if modelled) | Y                       | F   | All outcomes reported are in HIV positive women.                |
| 7   | Threshold cost per vaccine dose                                                                           | N/A                     | N/A | Not applicable.                                                 |
